# Supplementary material
Source: MDPI journal article supplement (https://www.mdpi.com/2072-4292/14/13/3051)
Supplement: s1 [file s1]

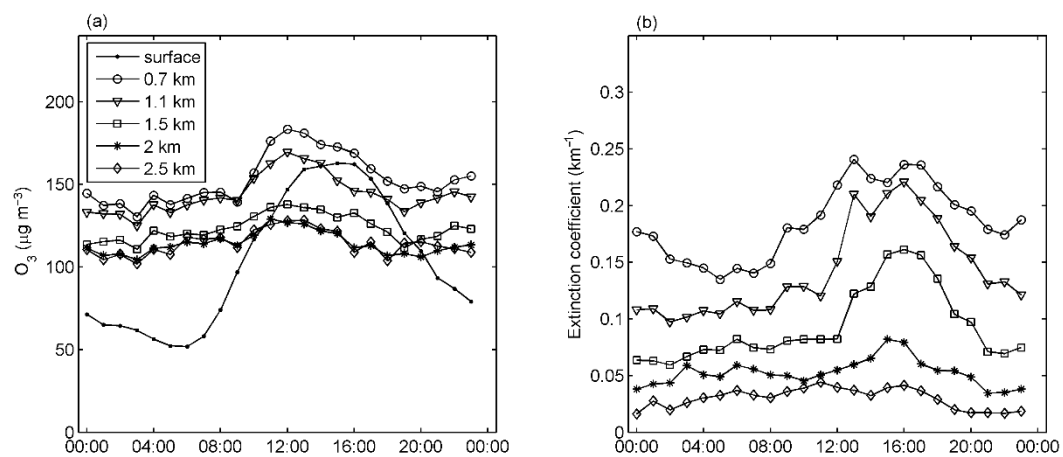

**Figure S1.** Diurnal variations in (a) ozone concentration and (b) aerosol extinction coefficient at different height during the lidar observation period in spring.
